# Supplementary material for: Runx1 shapes the chromatin landscape via a cascade of direct and indirect targets
Source: PubMed Central journal article supplement (PMC8219162; doi:10.1371/journal.pgen.1009574), 2021-06-10

# S3 Fig

## A.

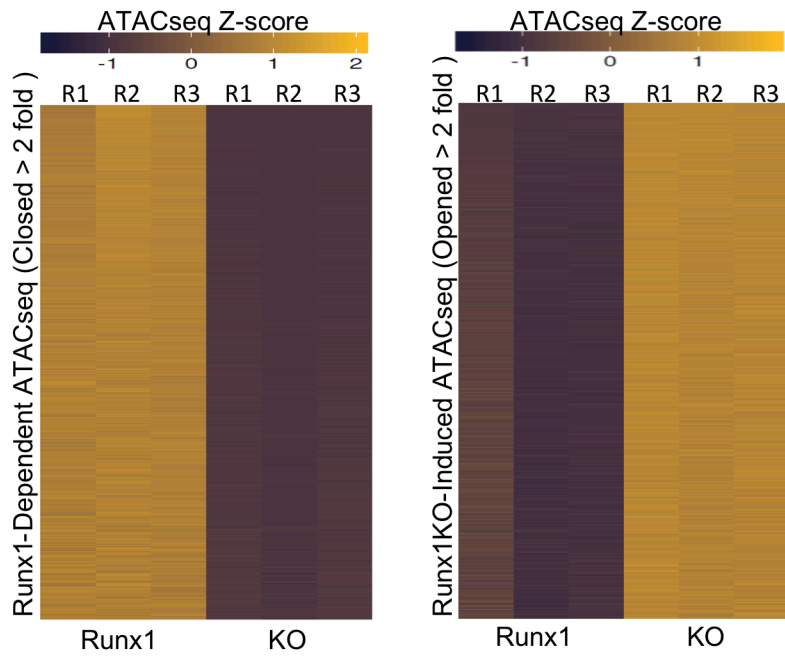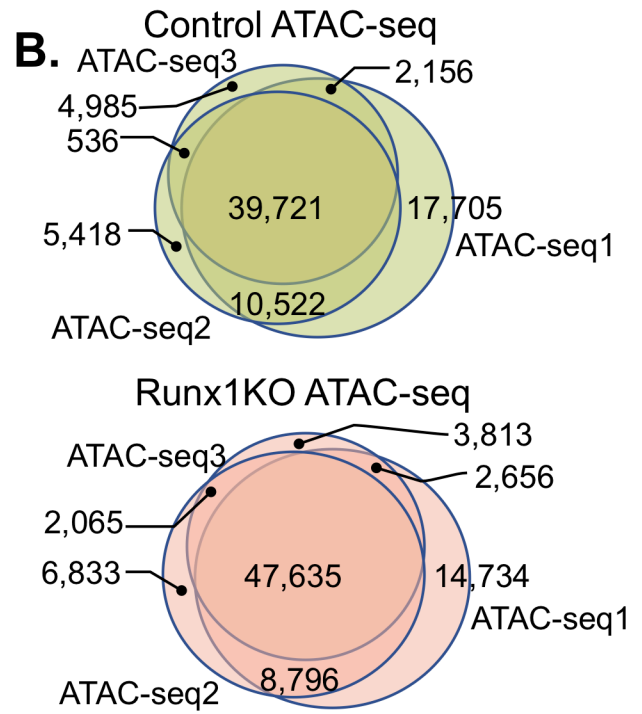

## C.

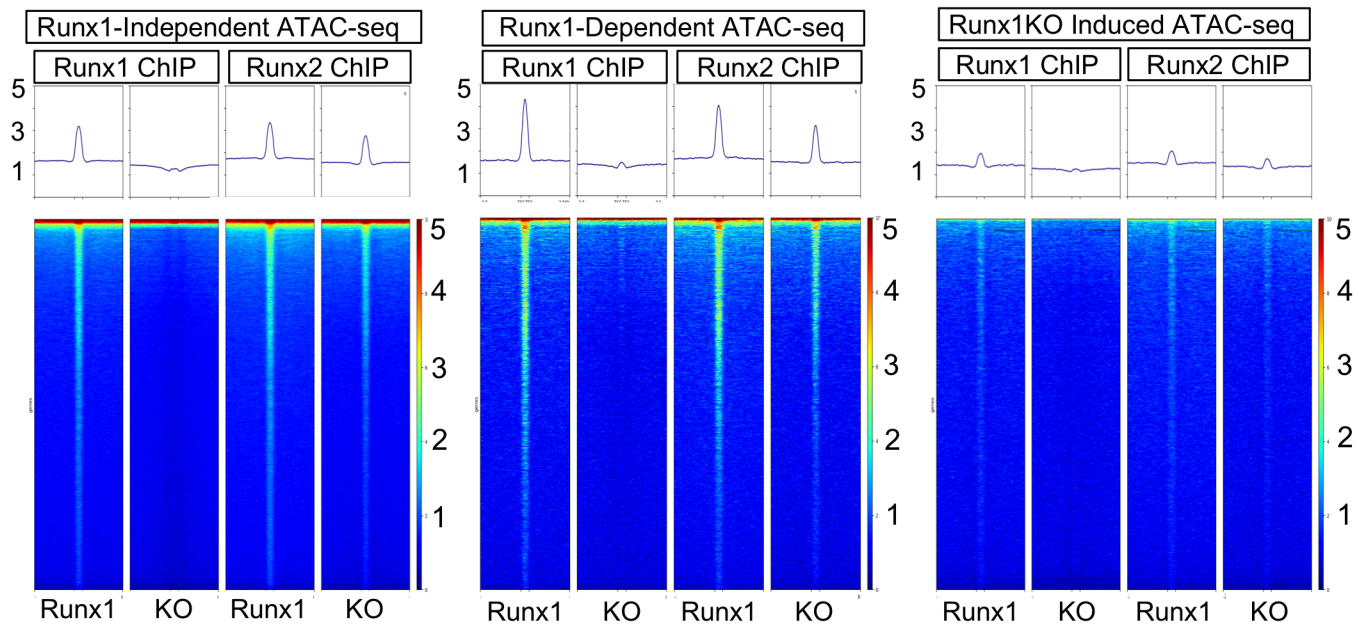

## D.

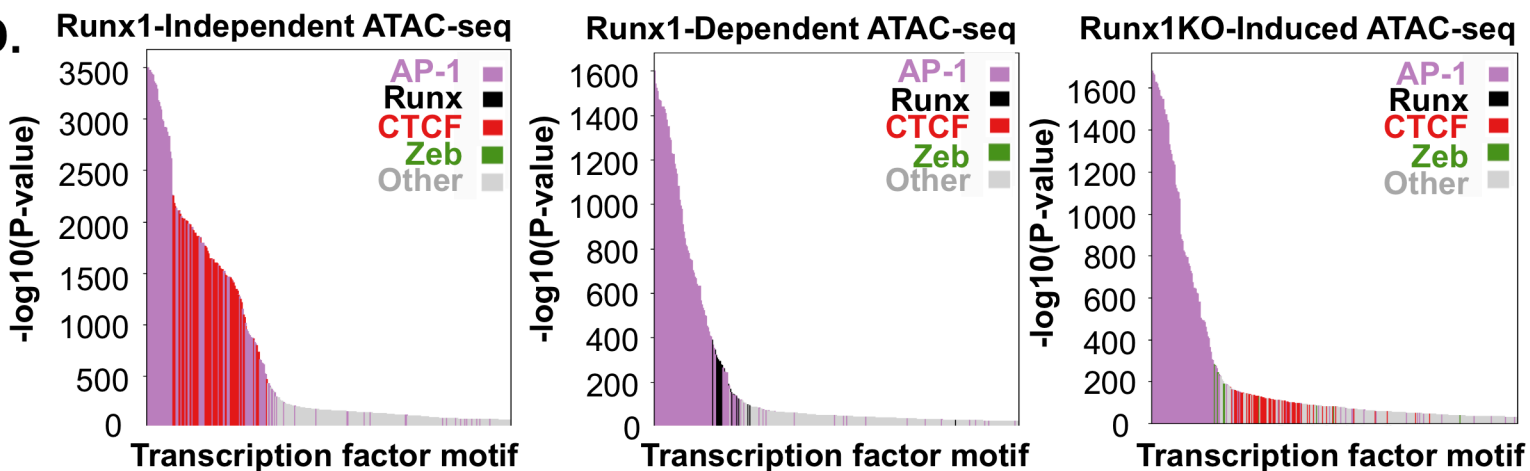

Supplement: pgen.1009574.s003.pdf [file pgen.1009574.s003.pdf]
