# Supplementary material for: Runx1 shapes the chromatin landscape via a cascade of direct and indirect targets
Source: PubMed Central journal article supplement (PMC8219162; doi:10.1371/journal.pgen.1009574), 2021-06-10

# S5 Fig

**A.**

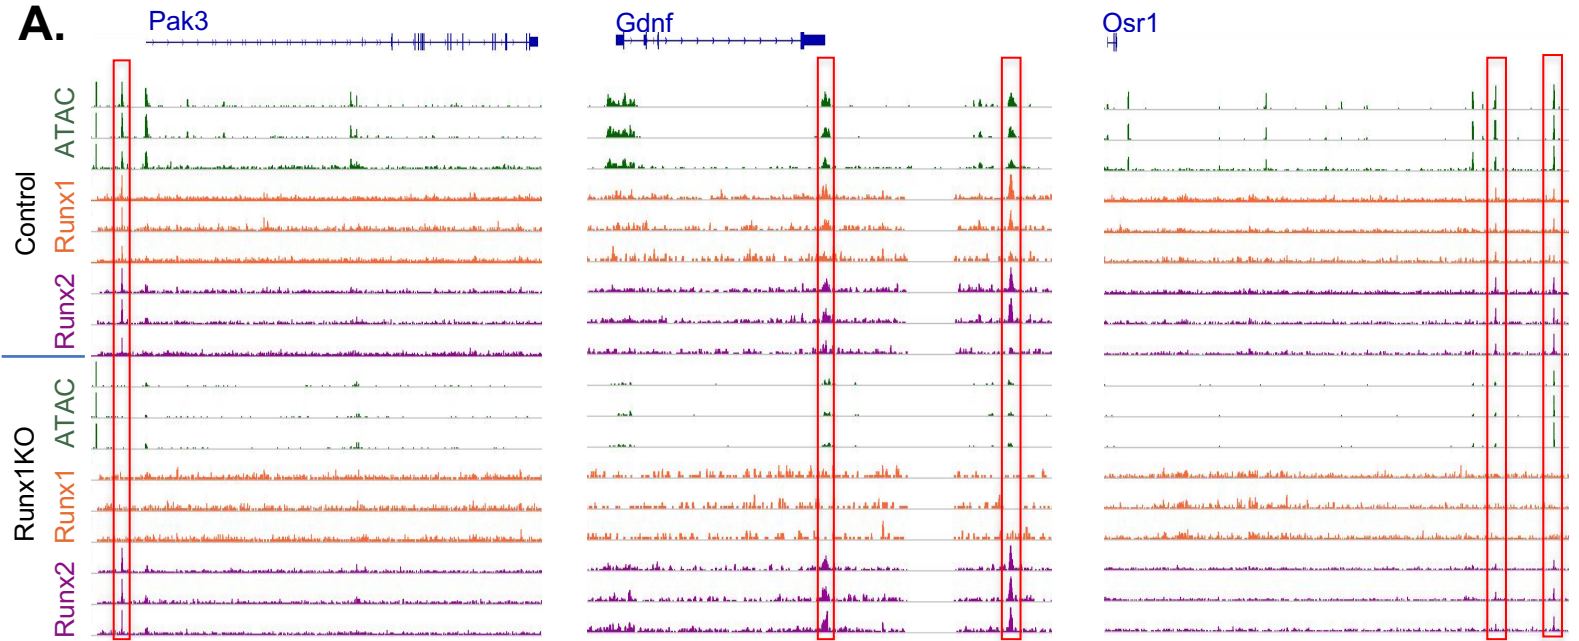

**B.**

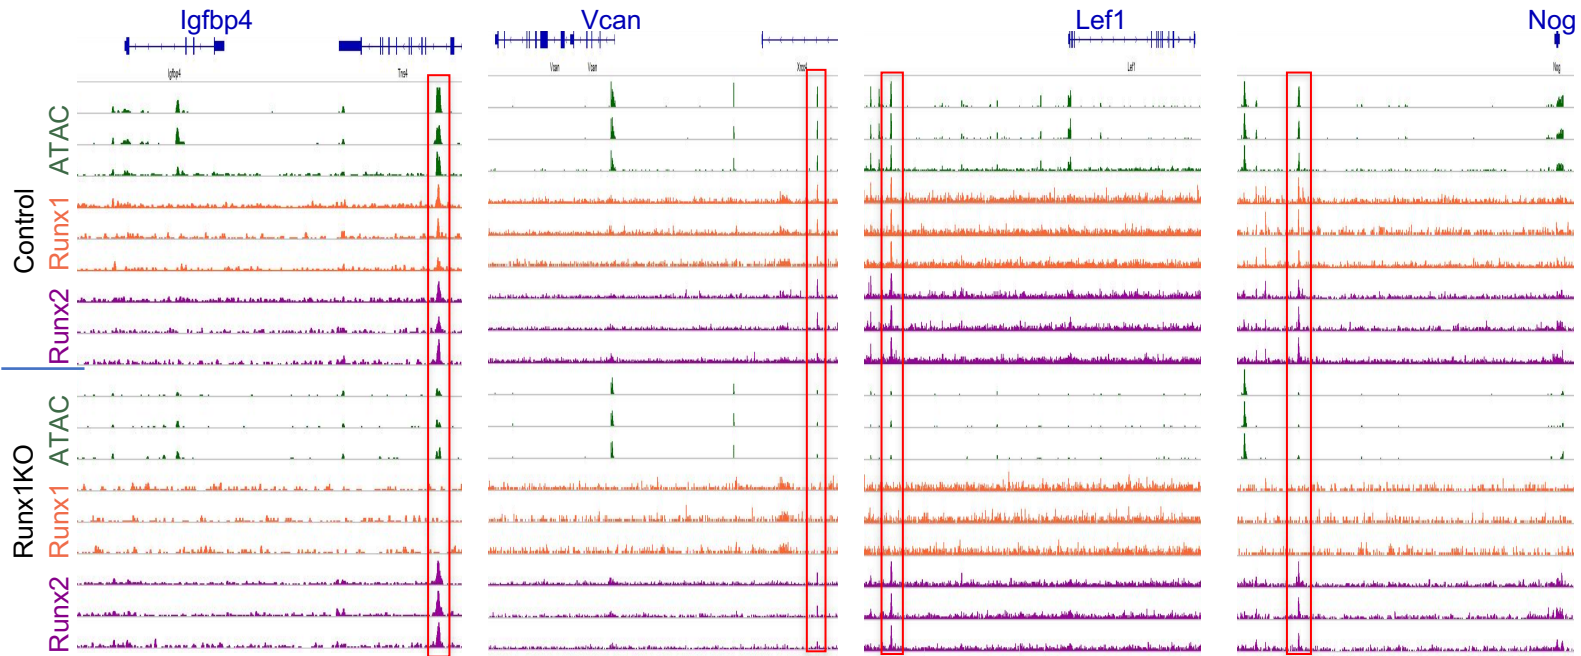

Supplement: pgen.1009574.s005.pdf [file pgen.1009574.s005.pdf]
