# Supplementary material for: Runx1 shapes the chromatin landscape via a cascade of direct and indirect targets
Source: PubMed Central journal article supplement (PMC8219162; doi:10.1371/journal.pgen.1009574), 2021-06-10

S7 Fig

**A**

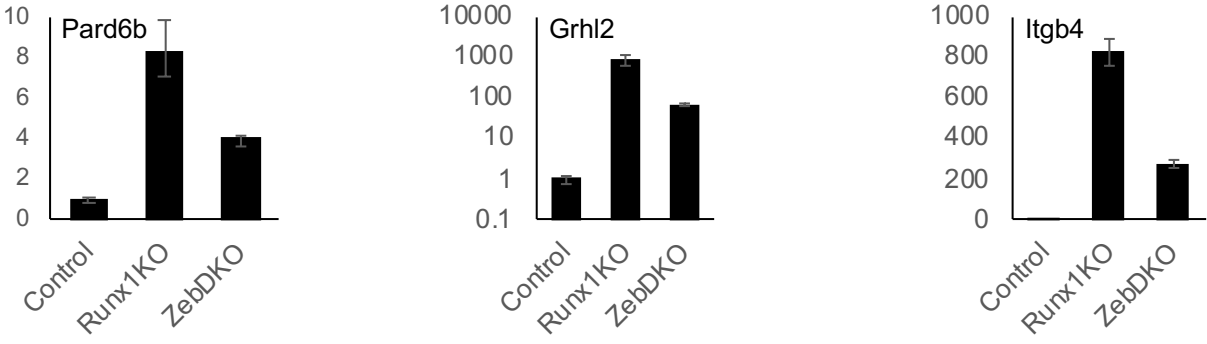

**B**

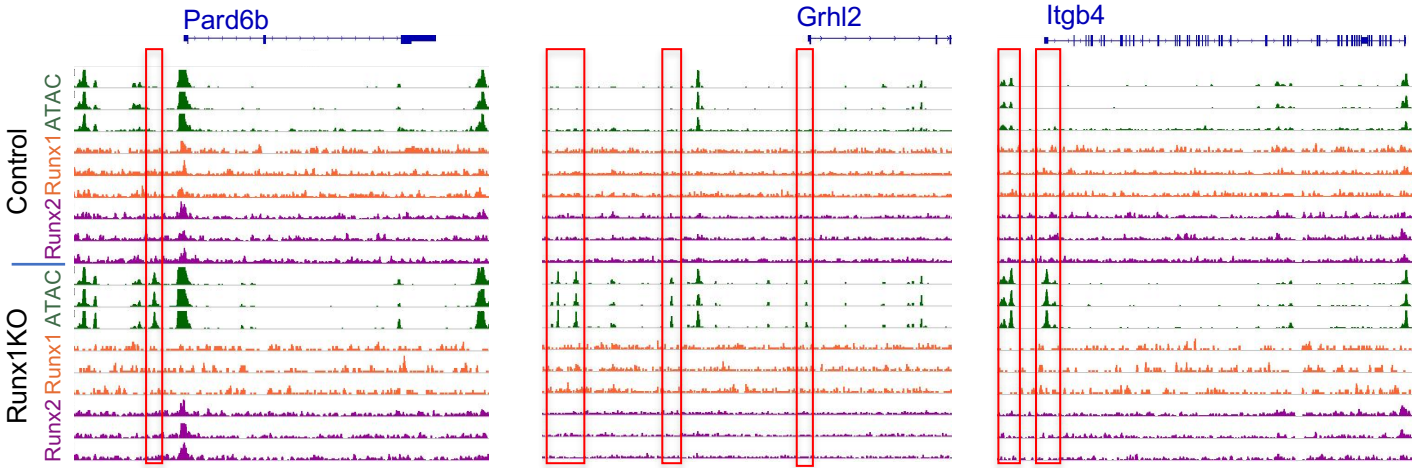

**C**

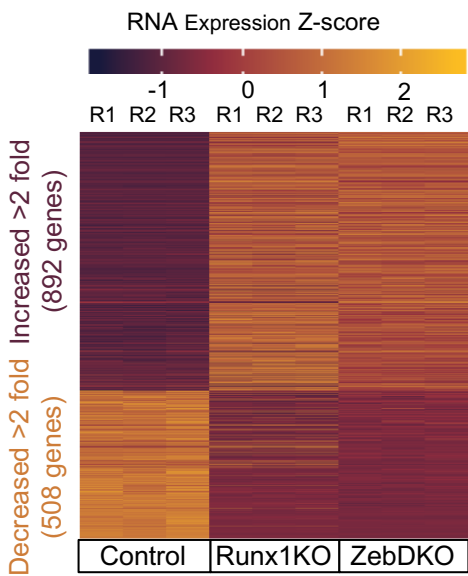

**D**

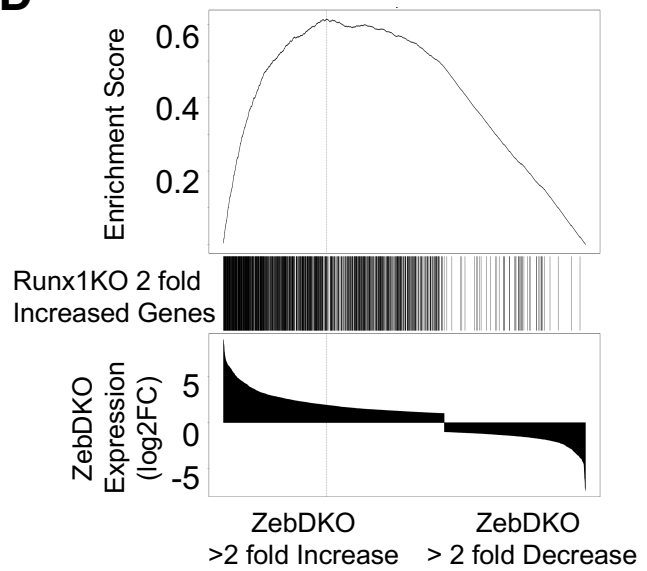

Supplement: pgen.1009574.s007.pdf [file pgen.1009574.s007.pdf]
